# Supplementary material
Source: PubMed Central journal article supplement (PMC7039456)
Supplement: NIHMS1546096-supplement-2.pdf [file NIHMS1546096-supplement-2.pdf]

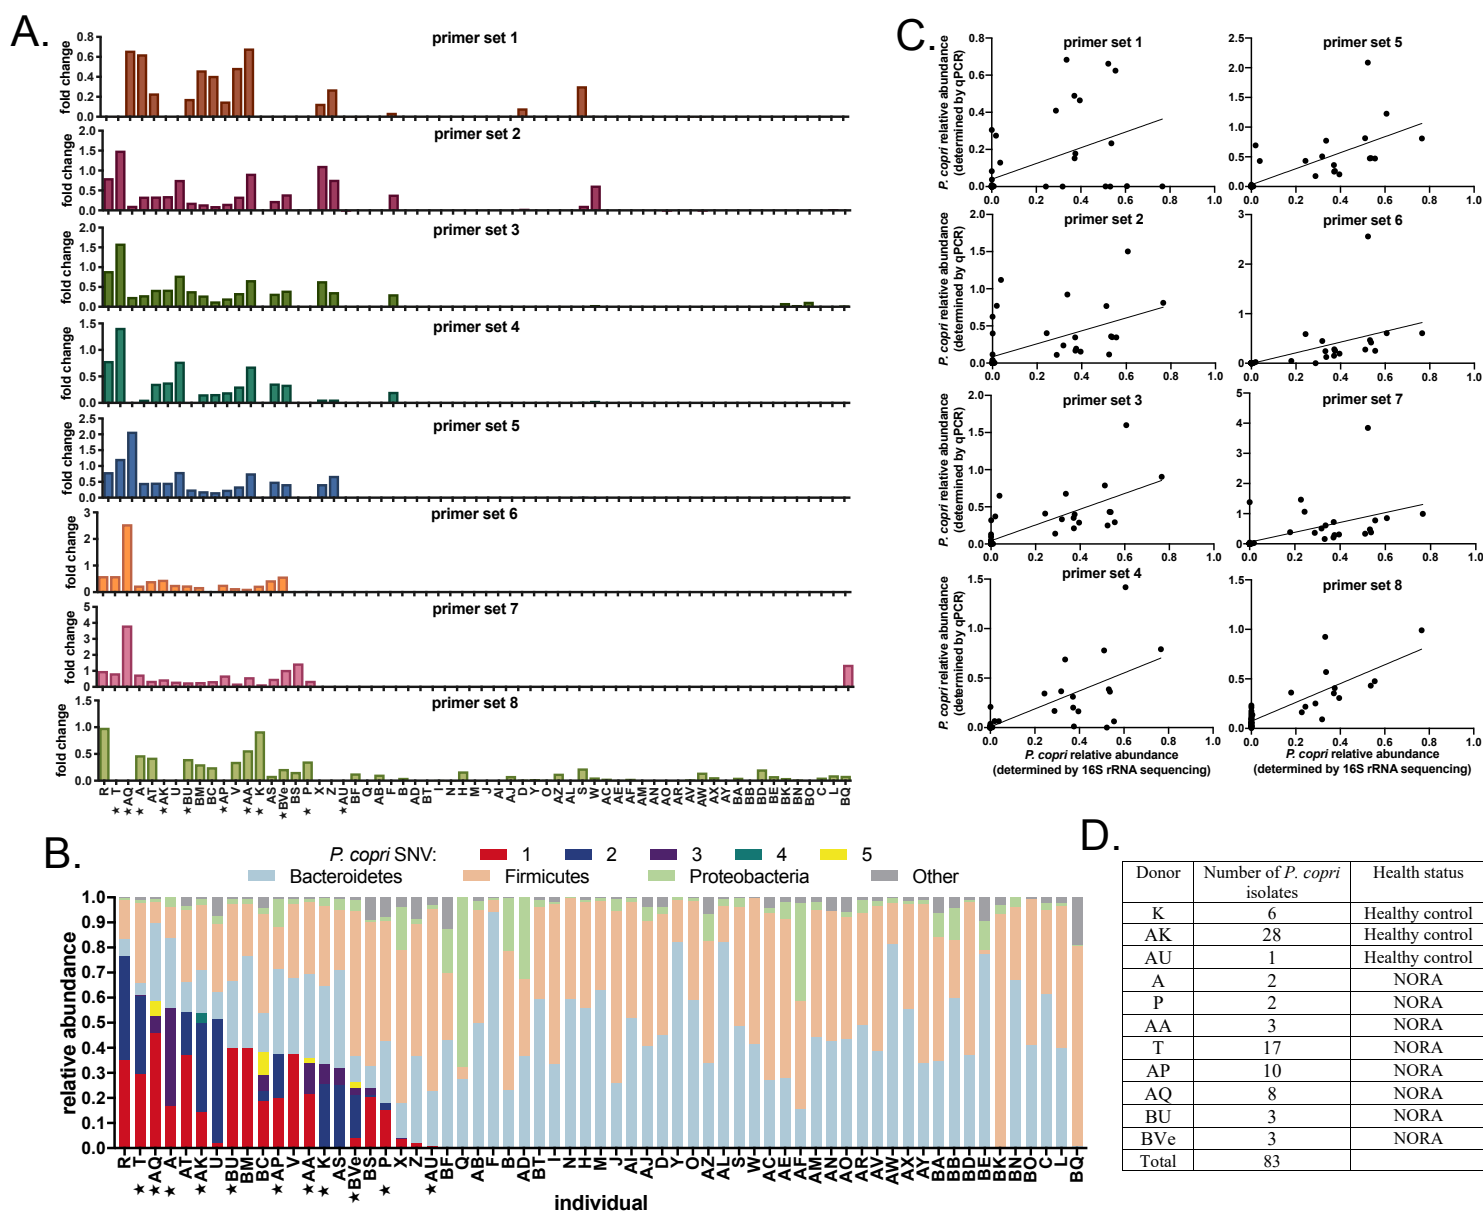

**Figure S1. Screen for and isolation of *P. copri* from human stool; related to Figure 1**

**A.** Eight sets of primers were designed to amplify conserved regions of the *P. copri* genome. Fecal DNA from each donor was screened by qPCR using each primer set (**Methods**). **B.** Relative abundance of *P. copri* 16S SNVs in human stool quantified by 16S sequencing. Percentage of total reads from 16S rRNA gene sequencing is shown. See also File S1. Stars in (**A**) and (**B**) indicate individuals from whom *P. copri* was isolated. **C.** Correlation of *P. copri* abundance determined by 16S sequencing and qPCR using each qPCR primer set. **D.** Number of *P. copri* isolates collected from individual donors. Health status is shown. NORA: new onset rheumatoid arthritis.

A.

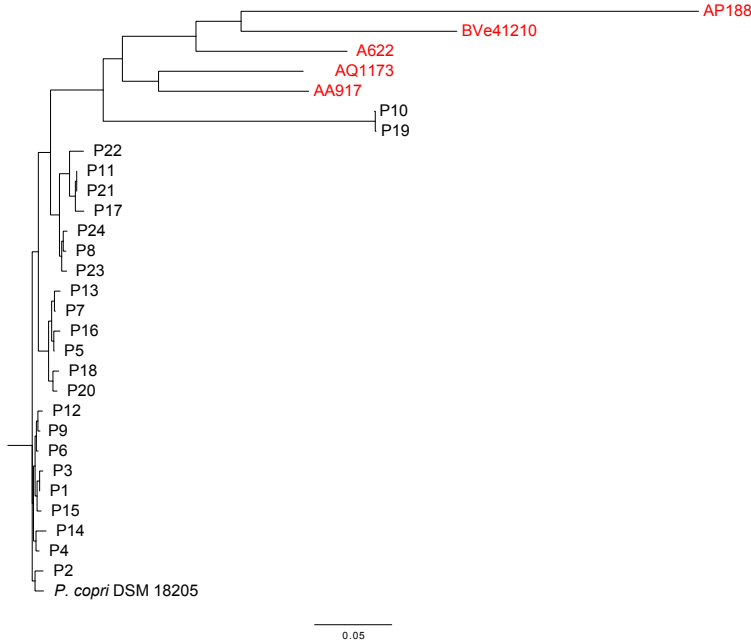

B.

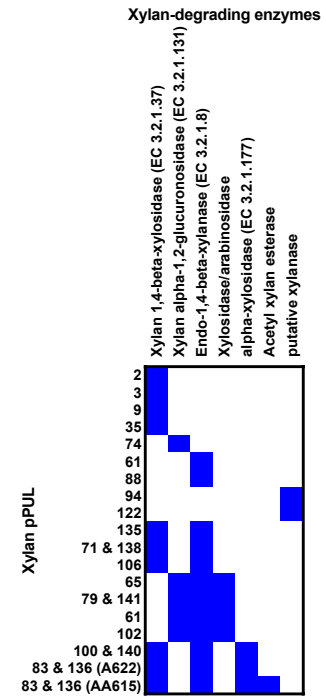

**Figure S2. Alignment of *Prevotella* 16S V1-V3 sequences;** related to Figure 2

**A.** Representative isolates were selected and the full length 16S sequence was determined by Sanger sequencing. 16S hypervariable V1-V3 sequences were aligned with *Prevotella* 16S V1-V3 sequences described in De Filippis, et al. (2016), labeled as P1-P23, using Clustal Omega. A simple phylogeny is shown. Isolates from this study are highlighted in red. **B.** Xylan-degrading enzyme annotations in each pPUL are shown. Presence of each xylan-degrading enzyme in each pPUL is indicated by a blue box.

A.

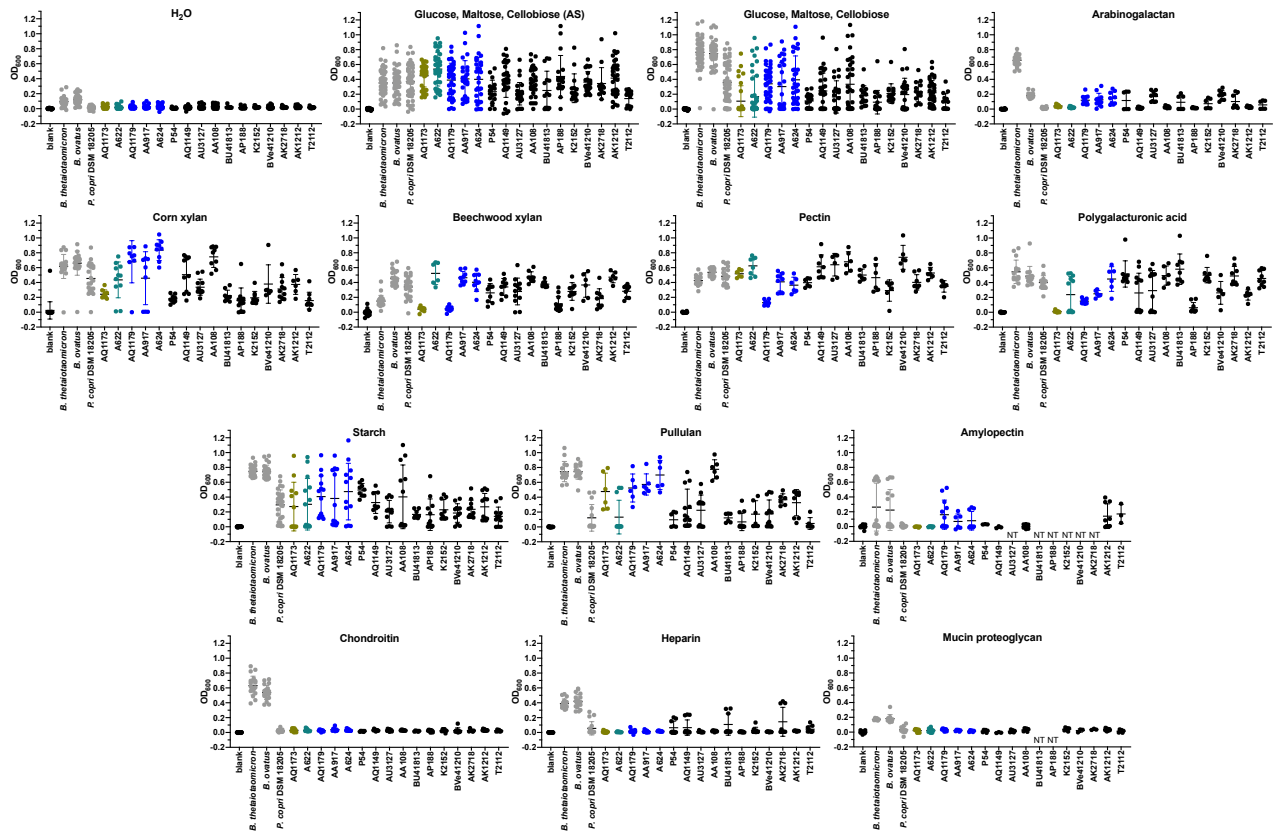

B.

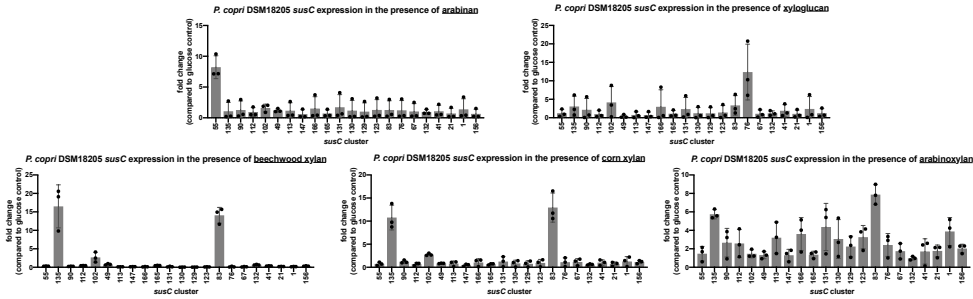

C.

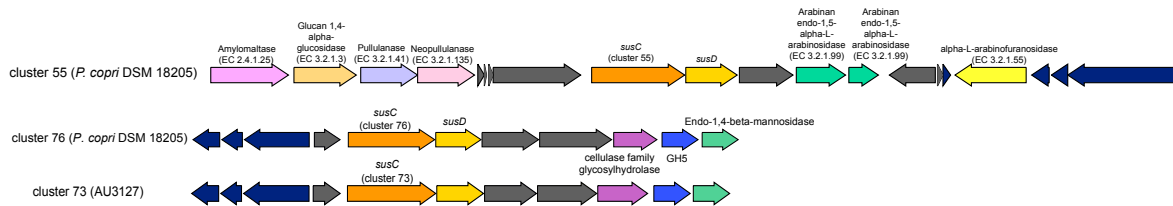

D.

|                             |                                                        | <i>B. thetaiotaomicron</i> | <i>B. ovatus</i> | <i>P. copri</i> DSM 18205 | AQ1173 | A622 | AQ1179 | AA917 | A624 | P54 | AQ1149 | AU3127 | AA108 | BU41813 | AP188 | K2152 | BV441210 | AK2718 | AK1212 | T2112 |   |
|-----------------------------|--------------------------------------------------------|----------------------------|------------------|---------------------------|--------|------|--------|-------|------|-----|--------|--------|-------|---------|-------|-------|----------|--------|--------|-------|---|
| <b>basis for prediction</b> | <b>Candidate substrate of pPUL</b>                     |                            |                  |                           |        |      |        |       |      |     |        |        |       |         |       |       |          |        |        |       |   |
| <i>susC</i> gene expression | Xylan (clusters 83 and 135 and pPULs with synteny)     | +                          | +                | +                         | +      | +    | +      | +     | +    | +   | +      | +      | +     | +       | +     | +     | +        | +      | +      | +     | + |
| genome sequence             | other xylan pPULs                                      | +                          | +                | +                         | +      | +    | +      | +     | +    | +   | +      | +      | +     | +       | +     | +     | +        | +      | +      | +     | + |
| <i>susC</i> gene expression | Arabinan (cluster 55)                                  | +                          | +                | +                         | +      | +    | +      | +     | +    | +   | +      | +      | +     | +       | +     | +     | +        | +      | +      | +     | + |
| genome sequence             | Arabinan (clusters 34 & 103)                           | +                          | +                | +                         | +      | +    | +      | +     | +    | +   | +      | +      | +     | +       | +     | +     | +        | +      | +      | +     | + |
| <i>susC</i> gene expression | Xyloglucan (cluster 76 and homologs)                   | +                          | +                | +                         | +      | +    | +      | +     | +    | +   | +      | +      | +     | +       | +     | +     | +        | +      | +      | +     | + |
| genome sequence             | Xyloglucan (clusters 24 and 51 and pPULs with synteny) | +                          | +                | +                         | +      | +    | +      | +     | +    | +   | +      | +      | +     | +       | +     | +     | +        | +      | +      | +     | + |
| genome sequence             | Arabinoxylan                                           | +                          | +                | +                         | +      | +    | +      | +     | +    | +   | +      | +      | +     | +       | +     | +     | +        | +      | +      | +     | + |
| genome sequence             | Levan or Inulin                                        | +                          | +                | +                         | +      | +    | +      | +     | +    | +   | +      | +      | +     | +       | +     | +     | +        | +      | +      | +     | + |
| genome sequence             | Pectins (Pectin or polygalacturonic acid)              | +                          | +                | +                         | +      | +    | +      | +     | +    | +   | +      | +      | +     | +       | +     | +     | +        | +      | +      | +     | + |
| genome sequence             | Rhamnogalacturonan I                                   | +                          | +                | +                         | +      | +    | +      | +     | +    | +   | +      | +      | +     | +       | +     | +     | +        | +      | +      | +     | + |
| genome sequence             | Arabinogalactan                                        | +                          | +                | +                         | +      | +    | +      | +     | +    | +   | +      | +      | +     | +       | +     | +     | +        | +      | +      | +     | + |
| genome sequence             | Beta-glucan                                            | +                          | +                | +                         | +      | +    | +      | +     | +    | +   | +      | +      | +     | +       | +     | +     | +        | +      | +      | +     | + |
| genome sequence             | Starch, pullulan, amylopectin                          | +                          | +                | +                         | +      | +    | +      | +     | +    | +   | +      | +      | +     | +       | +     | +     | +        | +      | +      | +     | + |
| genome sequence             | Glucomannan                                            | +                          | +                | +                         | +      | +    | +      | +     | +    | +   | +      | +      | +     | +       | +     | +     | +        | +      | +      | +     | + |
| genome sequence             | Chondroitin                                            | +                          | +                | +                         | +      | +    | +      | +     | +    | +   | +      | +      | +     | +       | +     | +     | +        | +      | +      | +     | + |
| genome sequence             | Heparin                                                | +                          | +                | +                         | +      | +    | +      | +     | +    | +   | +      | +      | +     | +       | +     | +     | +        | +      | +      | +     | + |
| genome sequence             | Mucin proteoglycan                                     | +                          | +                | +                         | +      | +    | +      | +     | +    | +   | +      | +      | +     | +       | +     | +     | +        | +      | +      | +     | + |

+ predicted growth; observed growth  
 - did not predict growth; did not observe growth  
 \* did not predict growth; observed growth  
 + predicted growth; did not observe growth  
 \* did not predict growth; observed growth; genome encodes substrate enzyme genes

**Figure S3. Growth of *P. copri* isolates on polysaccharides;** related to Figure 3

**A.** OD600 was measured for indicated isolates and polysaccharides after ~24h, ~48h, ~72h anaerobic incubation at 37 degrees C. Data indicate mean + SD and represent 2-3 experiments. Each condition was tested in duplicate or triplicate. Data show the highest OD from 24, 48, or 72h for each condition for each experiment. NT: not tested. **B.** *P. copri* DSM 18205 was grown to mid-log phase in the presence of the indicated polysaccharide substrates. Levels of *susC* transcripts were quantified by qRT-PCR. Graphs show fold change compared to a glucose control and indicate mean + SD. **C.** Schematic of PULs with *susC* genes that were upregulated in the presence arabinan and xyloglucan. PATRIC annotations are indicated above the PUL. Genes with annotations determined by homology are annotated beneath the PUL. Genes with the same annotation are the same color. Genes annotated as hypothetical proteins are gray. Genes with annotations unlikely to be involved in carbohydrate metabolism are colored dark blue. **D.** Growth data were matched to growth predictions based on the presence or absence of pPULs in the genomes. Growth was considered positive if the OD was statistically significant, as determined by one-way ANOVA and post hoc Dunnett's test using H<sub>2</sub>O (no carbon source) as the control (**Methods**).

**Table S3. Summary of *P. copri* isolate growth by *P. copri* complex clade; related to Figure 3**

| Substrate             | clade |   |     |     |
|-----------------------|-------|---|-----|-----|
|                       | B     | D | C   | A   |
| Corn xylan            | +     | + | +   | +/- |
| Beechwood xylan       | -     | + | +/- | +/- |
| Arabinoxylan          | -     | + | +   | +/- |
| Levan                 | +     | - | -   | +/- |
| Inulin                | +     | - | +   | +/- |
| Pectin                | +     | + | +/- | +/- |
| Polygalacturonic acid | -     | - | +/- | +/- |
| Rhamnogalacturonan I  | +     | + | -   | +/- |
| Arabinan              | -     | + | +   | +/- |
| Arabinogalactan       | -     | - | -   | +/- |
| Xyloglucan            | -     | + | -   | +/- |
| Beta-glucan           | +     | + | -   | +/- |
| Starch                | +     | + | +   | +/- |
| Pullulan              | +     | - | +   | +/- |
| Amylopectin           | -     | - | -   | +/- |
| Glucomannan           | -     | + | -   | +/- |
| Chondroitin           | -     | - | -   | -   |
| Heparin               | -     | - | -   | -   |
| Mucin proteoglycan    | -     | - | -   | -   |

**Table S4. Oligonucleotides used in screens; related to Methods, Figures S1, 3D, and S3B**

| screen                                                                                         | primer ID                 | oligonucleotide sequence (5' --> 3') | source             |
|------------------------------------------------------------------------------------------------|---------------------------|--------------------------------------|--------------------|
| <i>P. copri</i> screen (Figures S1A and S1C) and <i>susC</i> screen (Figure 3D and Figure S3B) | Universal 16S Primer 340F | ACTCCTACGGGAGGCAGCAGT                | Scher et al., 2013 |
|                                                                                                | Universal 16S Primer 515R | ATTACCGCGGCTGCTGGC                   | Scher et al., 2013 |
| <i>P. copri</i> screen (Figures S1A and S1C)                                                   | primer_set 1 F            | CCGGACTCCTGCCCCTGCAA                 | Scher et al., 2013 |
|                                                                                                | primer_set 1 R            | GTTGCGCCAGGCACTGCGAT                 | Scher et al., 2013 |
|                                                                                                | primer_set 2 F            | AATAGCTTTGGTGGCGCTTT                 | This study         |
|                                                                                                | primer_set 2 R            | AGGTTCCCTCACCGCATAACA                | This study         |
|                                                                                                | primer_set 3 F            | TTGGGTCGCCTGATGTTACC                 | This study         |
|                                                                                                | primer_set 3 R            | TCTTCAGCAGAAGCGTTGGT                 | This study         |
|                                                                                                | primer_set 4 F            | AGGACGTTGACCAGCAGAAG                 | This study         |
|                                                                                                | primer_set 4 R            | GCATAGCGGTTTTGGCTGAG                 | This study         |
|                                                                                                | primer_set 5 F            | GAGACGGGCTGGAGTGATTT                 | This study         |
|                                                                                                | primer_set 5 R            | TCCGTGTGGCTTTCATGGAG                 | This study         |
|                                                                                                | primer_set 6 F            | ACCGTAAGGAGCGTGTTCTG                 | This study         |
|                                                                                                | primer_set 6 R            | GTCGCGATTCTCTACTCCCG                 | This study         |
|                                                                                                | primer_set 7 16S F        | TTTGGAGACAATGACGCCCT                 | This study         |
|                                                                                                | primer_set 7 16S R        | ACTTAAGCCGACACCTCACG                 | This study         |
| <i>susC</i> screen (Figure 3D and Figure S3B)                                                  | primer_set 8 16S F        | CACRGTAAACGATGGATGCC                 | Scher et al., 2013 |
|                                                                                                | primer_set 8 16S R        | GGTCGGGTTGCAGACC                     | Scher et al., 2013 |
| <i>susC</i> screen (Figure 3D and Figure S3B)                                                  | susC_123_PUL1116_F_1      | CAAGTAAAGCCCAGCAAGGAC                | This study         |
|                                                                                                | susC_123_PUL1116_R_1      | TTACCCTGAAGTGCTACCGC                 | This study         |
|                                                                                                | susC_129_PUL1802_F_1      | TGGCTCTGTCAAGCGTAAGG                 | This study         |
|                                                                                                | susC_129_PUL1802_R_1      | TGCCTTTCCTGCATACCTG                  | This study         |
|                                                                                                | susC_130_PUL762_F_1       | TGCTCGATGAGGTGGTTGTC                 | This study         |
|                                                                                                | susC_130_PUL762_R_1       | TAACACCCGCAACCTTACCC                 | This study         |
|                                                                                                | susC_131_PUL1281_F_1      | CGTGGCATTGTTCGTCATCG                 | This study         |
|                                                                                                | susC_131_PUL1281_R_1      | TCAGAGCCTCACCATTCTGC                 | This study         |
|                                                                                                | susC_132_PUL1287_F_1      | TGCTGAAGACAACGAACCGA                 | This study         |
|                                                                                                | susC_132_PUL1287_R_1      | TTTACAACGTGCTTCTGCG                  | This study         |
|                                                                                                | susC_133_PUL484_F_1       | TCGAGGGTGGCGACAATAAC                 | This study         |
|                                                                                                | susC_133_PUL484_R_1       | CCATTAGAGGCACGGCTACC                 | This study         |
|                                                                                                | susC_135_PUL1745_F_1      | TACGTGGGTGGTTGGAATGG                 | This study         |
|                                                                                                | susC_135_PUL1745_R_1      | TCTCGCTAGGCATCACGTTG                 | This study         |
|                                                                                                | susC_102_PUL1218_F_2      | GGTGCTACGCTCGTGATTTC                 | This study         |
|                                                                                                | susC_102_PUL1218_R_2      | TCACCACCCACATTGGCTAC                 | This study         |
|                                                                                                | susC_112_PUL792_F_1       | TGACATGCAGAGTAGCGGTC                 | This study         |

|                                                               |                      |                        |            |
|---------------------------------------------------------------|----------------------|------------------------|------------|
| <i>susC</i> screen ( <b>Figure 3D</b> and <b>Figure S3B</b> ) | susC_112_PUL792_R_1  | GATGACACCATTGGCAGCAC   | This study |
|                                                               | susC_147_PUL2366_F_1 | GTGCAGCCCGCTATATGGAC   | This study |
|                                                               | susC_147_PUL2366_R_1 | CCACTGGGTTTTGTGTAGCG   | This study |
|                                                               | susC_156_PUL610_F_1  | CTCAGAGCGTTGACCCTAGC   | This study |
|                                                               | susC_156_PUL610_R_1  | TAATGCCCACTGCCTTACCG   | This study |
|                                                               | susC_1_PUL1911_F_1   | GATAATGGAGCTGCCATCCG   | This study |
|                                                               | susC_1_PUL1911_R_1   | CAGGCACTACAACAGAAGCG   | This study |
|                                                               | susC_21_PUL1668_F_1  | AGCTCTTGACGAGGTCGTTG   | This study |
|                                                               | susC_21_PUL1668_R_1  | TGGGTGATGTTGACACCAGG   | This study |
|                                                               | susC_41_PUL1672_F_1  | AAGGAGCTTGCTGACATCCC   | This study |
|                                                               | susC_41_PUL1672R_1   | TGATGTTTACACCGGCAAGC   | This study |
|                                                               | susC_49_PUL1214_F_1  | ATTTACCGGTTCTGCAGCCG   | This study |
|                                                               | susC_49_PUL1214_R_1  | CCAAAGCGTCTGTTACGTTGG  | This study |
|                                                               | susC_55_PUL621_F_1   | TCTTGGCTACAAGGAGCGTG   | This study |
|                                                               | susC_55_PUL621_R_1   | ACAGAACCGGTAAGGTCTGC   | This study |
|                                                               | susC_67_PUL1810_F_1  | CTGGCGAAACCTTGATTGGC   | This study |
|                                                               | susC_67_PUL1810_R_1  | GCCATTAGCAGCTTTCACGG   | This study |
|                                                               | susC_76_PUL296_F_1   | TGTCCTCAATGCTCAGACGG   | This study |
|                                                               | susC_76_PUL296_R_1   | CTGCACCATGACACTTGCAC   | This study |
|                                                               | susC_83_PUL1747_F_1  | TCTTGAAGACGACAACGCCA   | This study |
|                                                               | susC_83_PUL1747_R_1  | CCTGTGGTCTGCGCAATAGA   | This study |
|                                                               | susC_90_PUL499_F_1   | GCGCTCTGTACTGTTTGCAC   | This study |
|                                                               | susC_90_PUL499_R_1   | AATGACTGTCTCACCGGCAG   | This study |
|                                                               | susC_165_PUL2751_F_1 | TCGTGAAAGGTACCGTGCTG   | This study |
|                                                               | susC_165_PUL2751_R_1 | CCTCTTGTGCCACCATACCG   | This study |
|                                                               | susC_166_PUL485_F_1  | GAACCGGTTATTGGCGCATC   | This study |
|                                                               | susC_166_PUL485_R_1  | CTTGGCATTTCCTACTAGGAGC | This study |
